# Supplementary material for: Scalable droplet-based radiosynthesis of [18F]fluorobenzyltriphenylphosphonium cation ([18F]FBnTP) via a “numbering up” approach
Source: Royal Society of Chemistry journal article supplement (doi:10.1039/d3lc01068f), 2024-01-01
Supplement: d3lc01068f1.pdf [file d3lc01068f1.pdf]

# Supplemental Information

## Scalable droplet-based radiosynthesis of [ $^{18}\text{F}$ ]fluorobenzyltriphenylphosphonium cation ([ $^{18}\text{F}$ ]FBnTP) via a “numbering up” approach

Yingqing Lu,<sup>abc</sup> Jeffrey Collins,<sup>ab</sup> Kuo-Shyan Lin,<sup>de</sup> and R. Michael van Dam<sup>\*abc</sup>

<sup>a</sup>Crump Institute for Molecular Imaging, University of California Los Angeles (UCLA), Los Angeles, CA, USA

<sup>b</sup>Department of Molecular & Medical Pharmacology, UCLA, Los Angeles, CA, USA

<sup>c</sup>Physics and Biology in Medicine Interdepartmental Graduate Program, UCLA, Los Angeles, CA, USA

<sup>d</sup>Department of Molecular Oncology, BC Cancer Research Institute, Vancouver, British Columbia, Canada

<sup>e</sup>Department of Radiology, University of British Columbia, Vancouver, British Columbia, Canada

### Contents

|                                                           |    |
|-----------------------------------------------------------|----|
| 1. Microdroplet reaction chips .....                      | 2  |
| 2. Preliminary experiments.....                           | 2  |
| 3. Influence of reaction site diameter .....              | 3  |
| 4. Influence of amount of precursor.....                  | 3  |
| 6. Representative HPLC chromatograms .....                | 5  |
| 5.1 The synthesis by pooling two droplet reactions .....  | 5  |
| 5.2 The synthesis by pooling four droplet reactions ..... | 7  |
| 7. Molar activity determination .....                     | 8  |
| 8. Saturation of gamma detector on HPLC .....             | 9  |
| 9. References .....                                       | 11 |

## 1. Microdroplet reaction chips

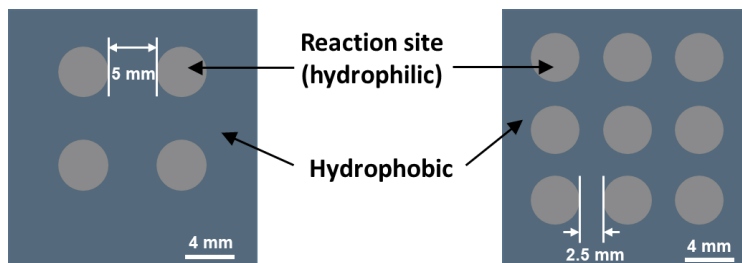

**Figure S1.** 2×2 and 3×3 multi-reaction chips for high-throughput synthesis optimization and for increasing synthesis scale by pooling the crude products of parallel reactions (“numbering up”).

## 2. Preliminary experiments

**Table S1.** Preliminary attempts at droplet radiosynthesis of [ $^{18}\text{F}$ ]FBnTP via the Cu-mediated route by adapting literature protocols. **Condition 1** was adapted from the macroscale conditions reported by Zhang *et al.*<sup>1</sup> (i.e. KOTf (1.33  $\mu\text{mol}$ ),  $\text{K}_2\text{CO}_3$  (1.81 nmol),  $\text{Cu}(\text{OTf})_2$  (20  $\mu\text{mol}$ ), precursor (4  $\mu\text{mol}$ ) in 850  $\mu\text{L}$  of DMF at 110°C for 20 min). The microscale reaction was performed by scaling down from 850  $\mu\text{L}$  to 10  $\mu\text{L}$  and keep the same reagent ratios, but with increased concentration ( $\sim 3\times$ ). **Conditions 2 and 3** are based on a previously reported droplet-based radiosynthesis of [ $^{18}\text{F}$ ]FDOPA<sup>2</sup> (fluorination reaction) but with [ $^{18}\text{F}$ ]FBnTP precursor instead, and two different amounts of precursor. **Condition 4** is the preliminary droplet condition for [ $^{18}\text{F}$ ]FBnTP synthesis reported in our recent paper<sup>3</sup>. All reactions were performed at 110°C for 5 min.

| Condition                                       | 1                                             | 2                                             | 3                                             | 4                                             |
|-------------------------------------------------|-----------------------------------------------|-----------------------------------------------|-----------------------------------------------|-----------------------------------------------|
| Reference                                       | 1                                             | 2                                             | 2                                             | 3                                             |
| PTC and base composition (nmol)                 | KOTf (50)<br>$\text{K}_2\text{CO}_3$ (0.0675) | TEAOTf (300)<br>$\text{Cs}_2\text{CO}_3$ (10) | TEAOTf (300)<br>$\text{Cs}_2\text{CO}_3$ (10) | TEAOTf (300)<br>$\text{Cs}_2\text{CO}_3$ (10) |
| Precursor ( $\mu\text{mol}$ )                   | 0.15                                          | 0.15                                          | 0.45                                          | 0.45                                          |
| Copper reagent ( $\mu\text{mol}$ )              | $\text{Cu}(\text{OTf})_2$ (0.75)              | $\text{Cu}(\text{Py})_4(\text{OTf})_2$ (0.68) | $\text{Cu}(\text{Py})_4(\text{OTf})_2$ (0.68) | $\text{Cu}(\text{Py})_4(\text{OTf})_2$ (0.68) |
| Solvent composition (10 $\mu\text{L}$ reaction) | DMF/Py (96:4, v/v)                            | DMF/Py (96:4, v/v)                            | DMF/Py (96:4, v/v)                            | DMI/Py (96:4, v/v)                            |
| <b>Performance (n = 3)</b>                      |                                               |                                               |                                               |                                               |
| Starting activity (MBq)                         | 262 $\pm$ 4                                   | 262 $\pm$ 4                                   | 262 $\pm$ 4                                   | 262 $\pm$ 4                                   |
| Collection efficiency (%)                       | 80 $\pm$ 4                                    | 32 $\pm$ 1                                    | 33 $\pm$ 1                                    | 90 $\pm$ 1                                    |
| Residual on pipette tip (%)                     | 1 $\pm$ 0                                     | 1 $\pm$ 1                                     | 0.3 $\pm$ 0.2                                 | 0.4 $\pm$ 0.2                                 |
| Radiochemical conversion (RCC, %)               | 0                                             | 25 $\pm$ 1                                    | 53 $\pm$ 8                                    | 92 $\pm$ 1                                    |
| Crude RCY (%)                                   | 0                                             | 8 $\pm$ 0                                     | 17 $\pm$ 3                                    | 83 $\pm$ 2                                    |

### 3. Influence of reaction site diameter

**Table S2.** Comparison of the reaction performance on chips with 4 mm reaction sites (this work) vs 3 mm reaction sites (reported by Jones *et al.*<sup>3</sup>).

|                            | Reaction site diameter (mm) | Number of replicates (n) | RCC (%) | Collection efficiency (%) | Crude RCY (%) |
|----------------------------|-----------------------------|--------------------------|---------|---------------------------|---------------|
| This work <sup>a</sup>     | 4                           | 3                        | 92 ± 1  | 90 ± 1                    | 83 ± 2        |
| Previous work <sup>a</sup> | 3                           | 4                        | 89 ± 1  | 97 ± 2                    | 86 ± 2        |

<sup>a</sup>All reactions were performed as follows. 5 µL of [<sup>18</sup>F]F<sup>-</sup> and 5 µL of TEAOTf (0.3 µmol)/Cs<sub>2</sub>CO<sub>3</sub> (0.01 µmol) were dispensed on the reaction site and dried at 105°C for 1 min. The precursor (0.45 µmol) and Cu(OTf)<sub>2</sub>(Py)<sub>4</sub> (0.68 µmol) in 10 µL of DMI/pyridine (96:4, v/v) were then added and reacted at 110°C for 5 min.

### 4. Influence of amount of precursor

**Table S3.** Summary of data acquired when exploring the impact of precursor amount for preparing [<sup>18</sup>F]FBnTP. Each condition was repeated n = 3 times.

| Precursor amount (µmol) <sup>a</sup> | RCC (%) | Collection efficiency (%) | Crude RCY (%) |
|--------------------------------------|---------|---------------------------|---------------|
| 0.15                                 | 92 ± 0  | 89 ± 2                    | 82 ± 2        |
| 0.20                                 | 96 ± 0  | 90 ± 4                    | 86 ± 3        |
| 0.30                                 | 97 ± 0  | 89 ± 2                    | 86 ± 2        |
| 0.45                                 | 97 ± 1  | 90 ± 3                    | 88 ± 3        |
| 0.60                                 | 99 ± 0  | 93 ± 2                    | 92 ± 2        |

<sup>a</sup>All reactions were performed as follows. 5 µL of [<sup>18</sup>F]F<sup>-</sup> and 5 µL of TEAOTf (0.3 µmol)/Cs<sub>2</sub>CO<sub>3</sub> (0.01 µmol) were dispensed on the reaction site and dried at 105°C for 1 min. The precursor (amounts indicated) and Cu(OTf)<sub>2</sub>(Py)<sub>4</sub> (0.68 µmol) in 10 µL of DMI/pyridine (96:4, v/v) were then added and reacted at 110°C for 5 min.

### 5. Influence of starting activity and volume of [<sup>18</sup>F]fluoride

**Table S4.** Summary of data acquired when exploring the impact of [<sup>18</sup>F]fluoride volume or starting activity when preparing [<sup>18</sup>F]FBnTP. Precursor amount for these studies was 0.45 µmol. All experiments were performed at relatively low activity (11.7-69.6 MBq).

| [ <sup>18</sup> F]fluoride volume (µL) | Number of replicates (n) | Starting activity (MBq) | RCC (%) | Collection efficiency (%) | Crude RCY (%) |
|----------------------------------------|--------------------------|-------------------------|---------|---------------------------|---------------|
| 5                                      | 2                        | 11.9 ± 0.3              | 92 ± 0  | 92 ± 2                    | 84 ± 2        |
| 10                                     | 2                        | 23.6 ± 0.4              | 95 ± 1  | 92 ± 1                    | 87 ± 1        |
| 15                                     | 2                        | 34.6 ± 0.3              | 93 ± 1  | 92 ± 1                    | 85 ± 0        |
| 20                                     | 2                        | 45.7 ± 0.8              | 91 ± 2  | 90 ± 1                    | 81 ± 2        |
| 25                                     | 1                        | 56.2                    | 93      | 90                        | 84            |
| 40                                     | 2                        | 68.0 ± 2.3              | 32 ± 27 | 81 ± 13                   | 24 ± 18       |

**Table S5.** Summary of data acquired when exploring the impact of precursor amount in conjunction with higher volume of [<sup>18</sup>F]fluoride (40 μL) when preparing [<sup>18</sup>F]FBnTP. All experiments were performed at relatively low activity (58.2-69.6 MBq). Each condition was repeated n = 2 times.

| Precursor amount (μmol) | Starting activity (MBq) | RCC (%) | Collection efficiency (%) | Crude RCY (%) |
|-------------------------|-------------------------|---------|---------------------------|---------------|
| 0.45                    | 68.0 ± 2.3              | 32 ± 27 | 81 ± 13                   | 24 ± 18       |
| 0.60                    | 60.5 ± 1.8              | 52 ± 1  | 85 ± 1                    | 44 ± 2        |
| 0.75                    | 59.2 ± 1.4              | 47 ± 3  | 88 ± 7                    | 41 ± 6        |
| 0.90                    | 60.3 ± 1.9              | 55 ± 12 | 84 ± 4                    | 47 ± 13       |
| 1.05                    | 59.8 ± 0.1              | 65 ± 5  | 89 ± 1                    | 57 ± 4        |

**Table S6.** Summary of data acquired when exploring the impact of [<sup>18</sup>F]fluoride volume or starting activity when preparing [<sup>18</sup>F]FBnTP. Precursor amount for these studies was 0.60 μmol. Experiments were performed over a wider activity range (25.3-1510 MBq).

| [ <sup>18</sup> F]fluoride volume (μL) | Number of replicates (n) | Starting activity (MBq) | RCC (%) | Collection efficiency (%) | Crude RCY (%) |
|----------------------------------------|--------------------------|-------------------------|---------|---------------------------|---------------|
| 5                                      | 6                        | 86 ± 47                 | 94 ± 2  | 91 ± 3                    | 86 ± 4        |
| 25                                     | 2                        | 710 ± 270               | 74 ± 7  | 86 ± 5                    | 63 ± 2        |
| 30                                     | 2                        | 930 ± 180               | 73 ± 1  | 85 ± 1                    | 62 ± 2        |
| 40                                     | 2                        | 60.5 ± 1.8              | 52 ± 1  | 85 ± 1                    | 44 ± 2        |
| 42                                     | 2                        | 970 ± 770               | 26 ± 16 | 89 ± 1                    | 23 ± 14       |

## 6. Representative HPLC chromatograms

### 5.1 The synthesis by pooling two droplet reactions

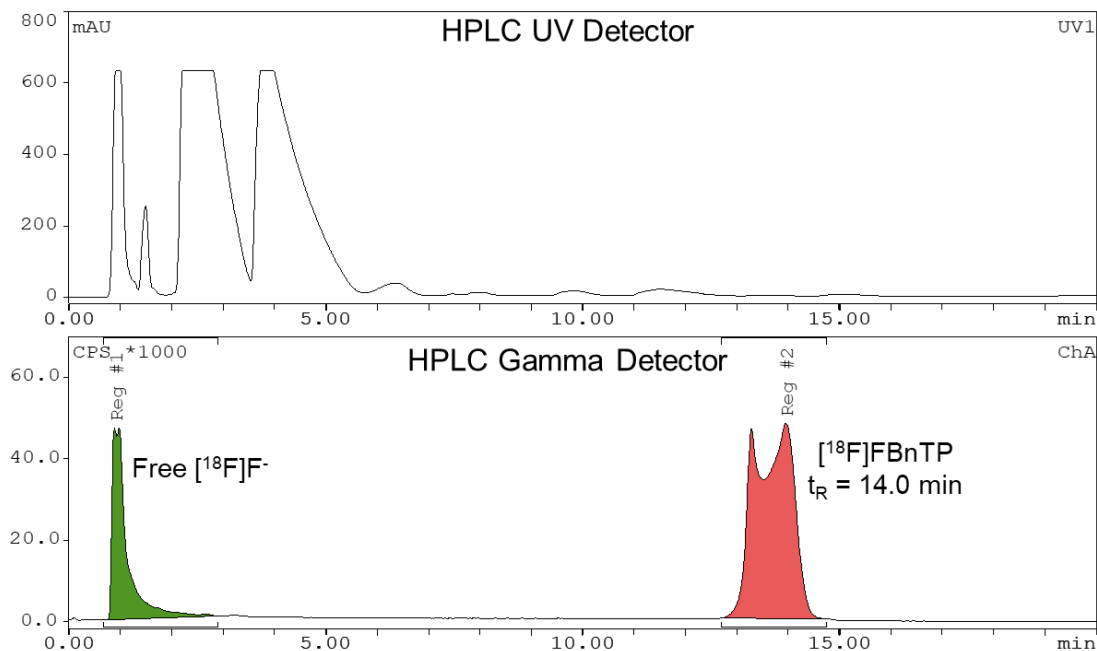

**Figure S2.** Radio-HPLC chromatogram, during purification on an analytical column, of crude  $[^{18}\text{F}]$ FBnTP by pooling two droplet reactions. The apparent split in the product peak is an artifact due to saturation of the radiation detector.

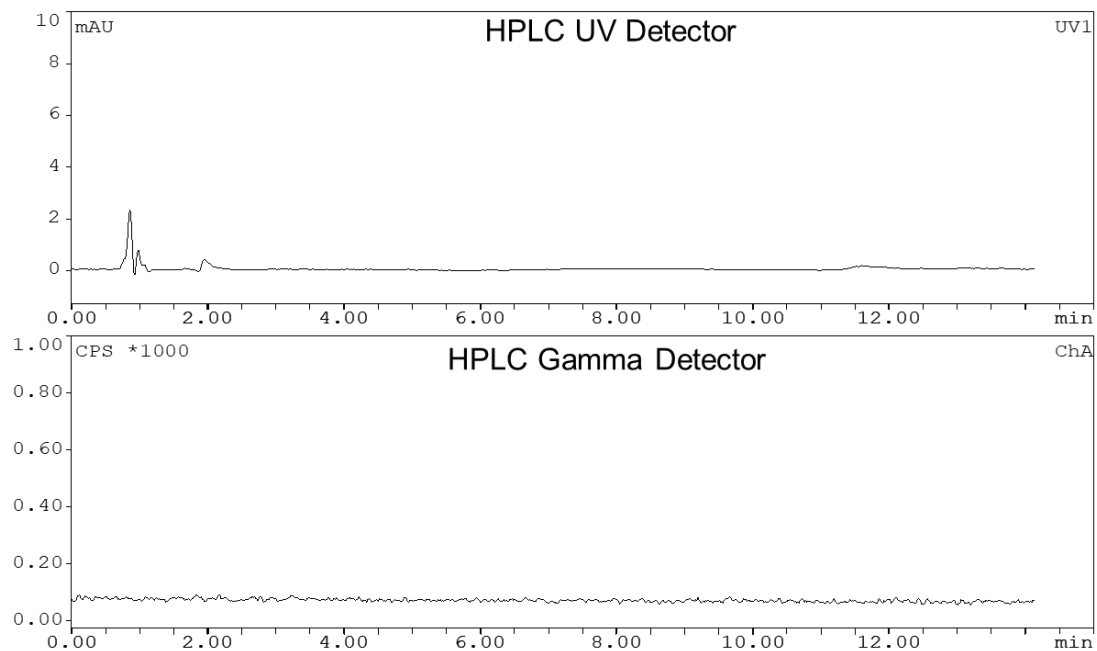

**Figure S3.** Blank injection of formulation buffer, i.e., saline and EtOH (9:1, v/v).

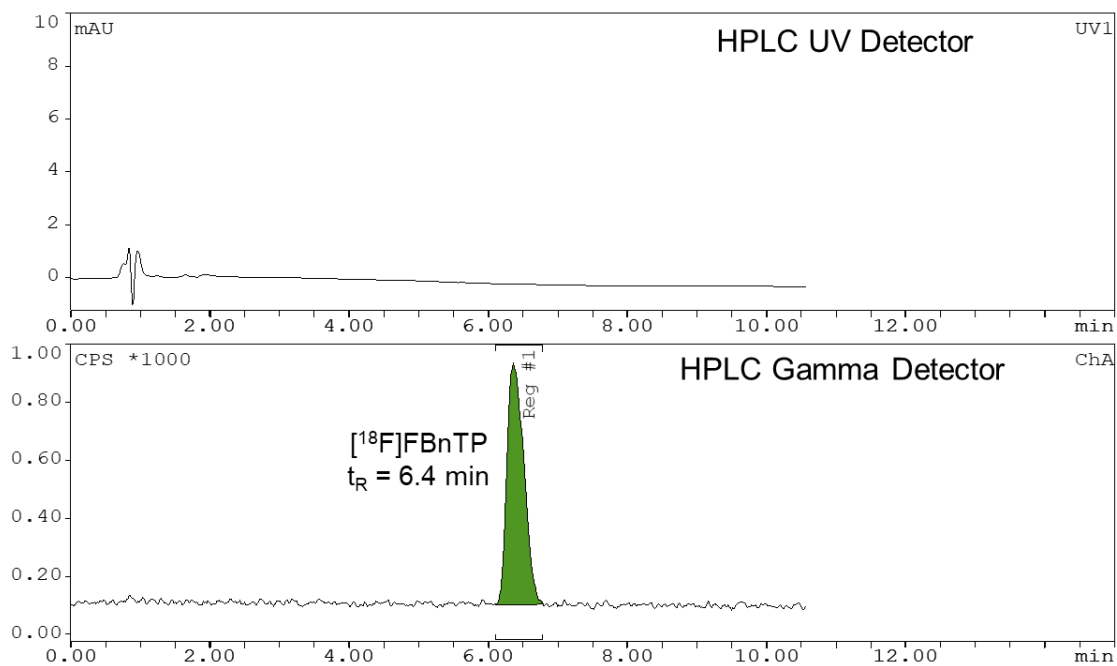

**Figure S4.** Radio-HPLC chromatogram of formulated  $[^{18}\text{F}]\text{FBnTP}$  (from pooling two droplet reactions).

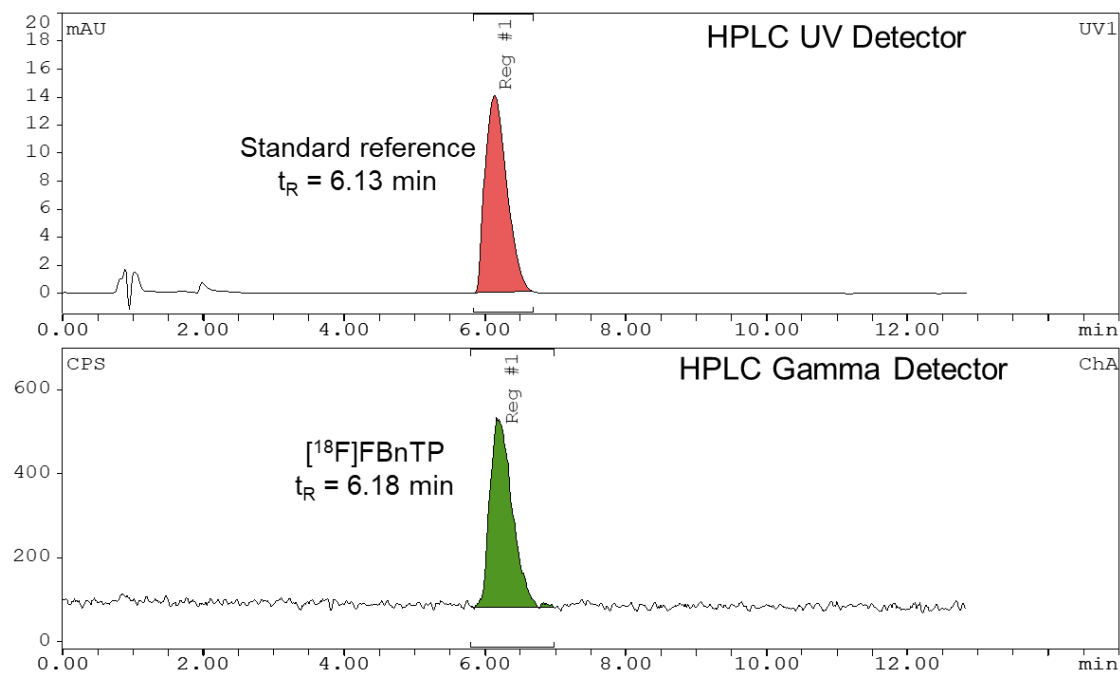

**Figure S5.** Radio-HPLC chromatogram of co-injection of formulated  $[^{18}\text{F}]\text{FBnTP}$  (from pooling two droplet reactions) and FBnTP reference standard.

## 5.2 The synthesis by pooling four droplet reactions

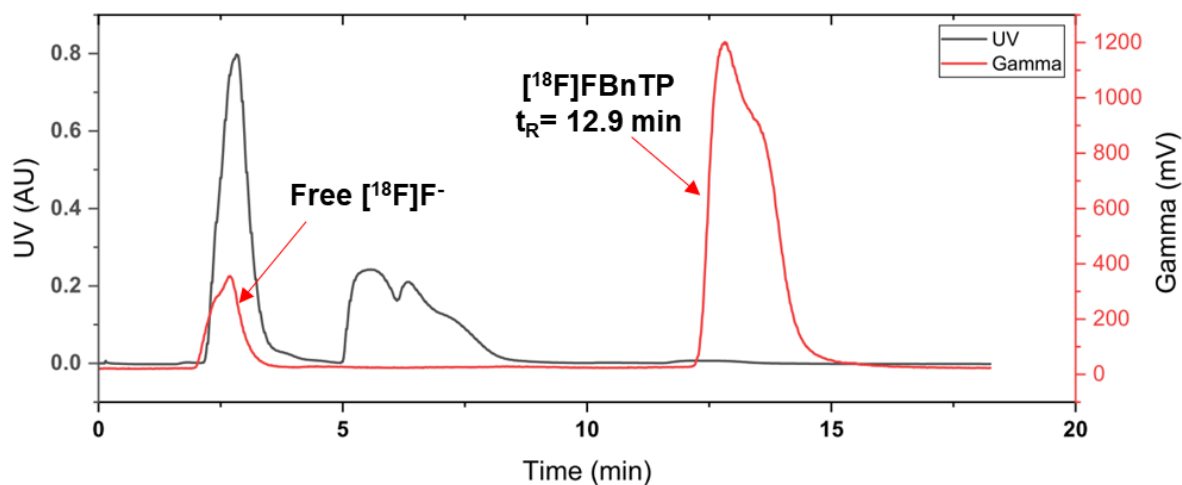

**Figure S6.** Radio-HPLC chromatogram, during purification on a semi-prep column, of crude [<sup>18</sup>F]FBnTP by pooling four droplet reactions.

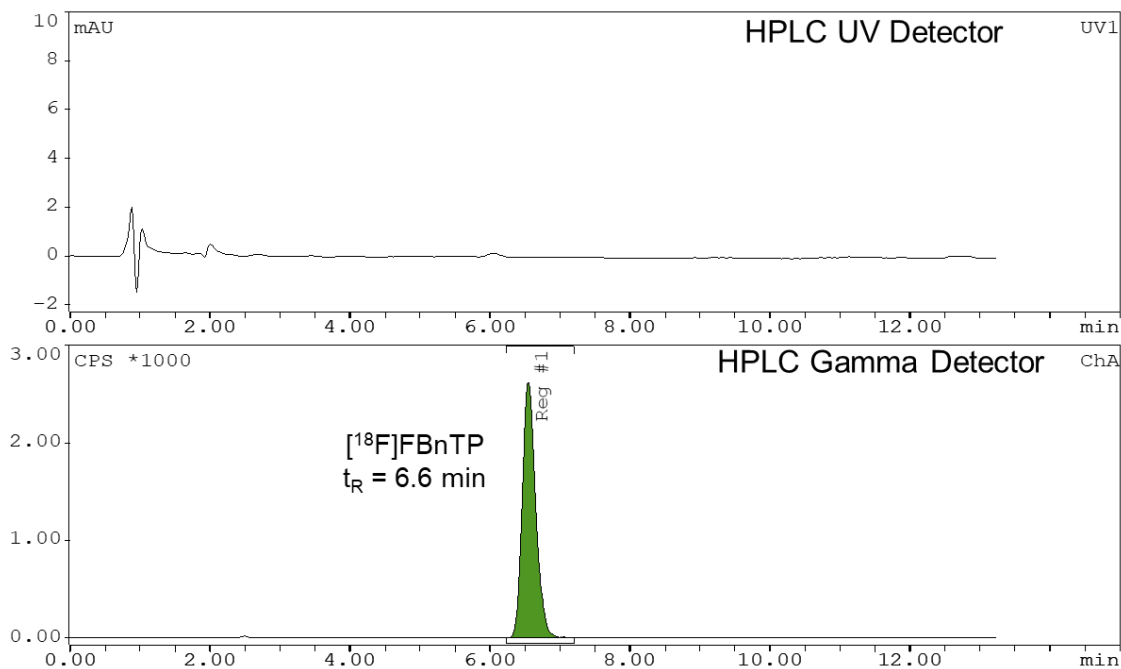

**Figure S7.** Radio-HPLC chromatogram of formulated [<sup>18</sup>F]FBnTP (from pooling four droplet reactions).

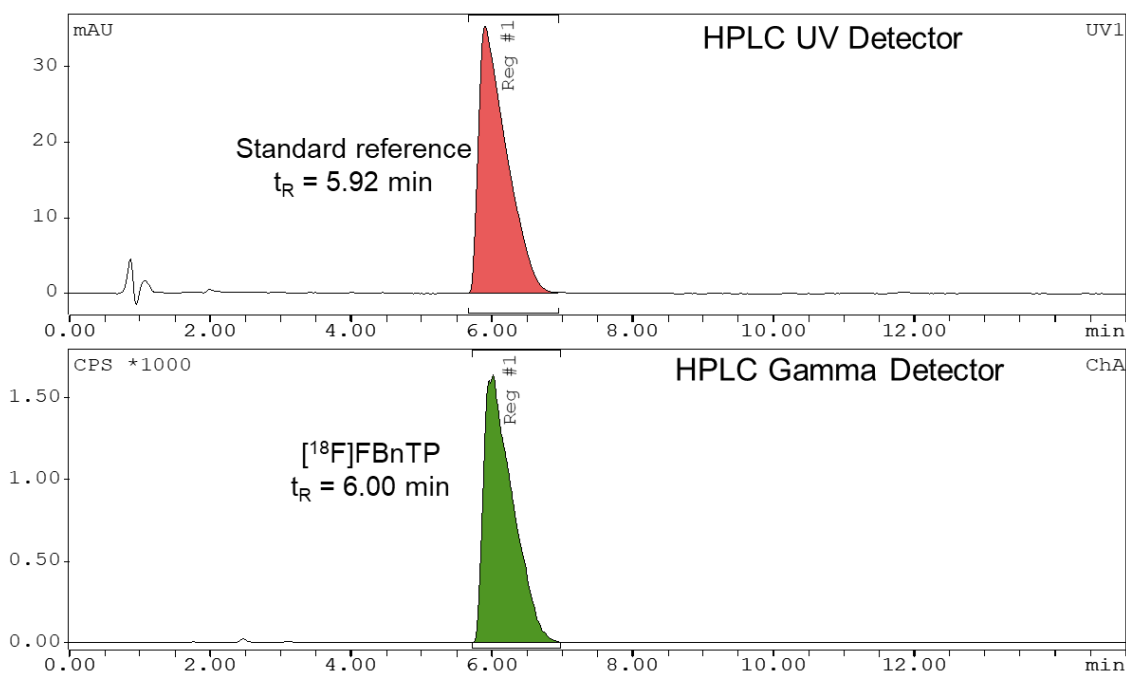

**Figure S8.** Radio-HPLC chromatogram of coinjection of formulated [ $^{18}\text{F}$ ]FBnTP (from pooling four droplet reactions) and FBnTP reference standard.

## 7. Molar activity determination

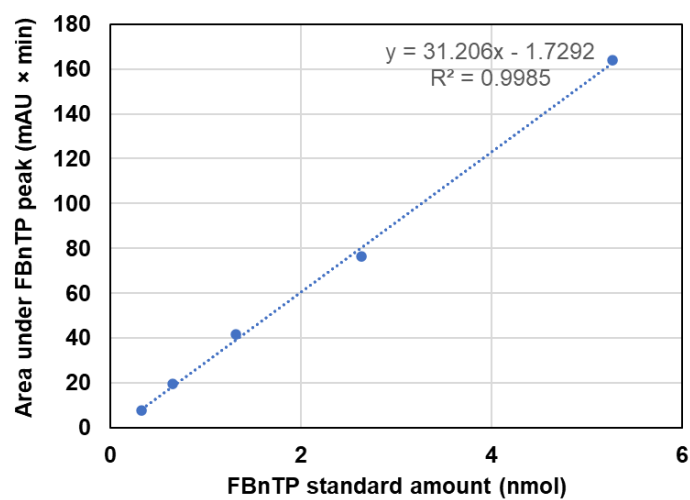

**Figure S10.** Calibration curve of FBnTP reference standard. UV absorbance was measured at 254 nm.



## 8. Saturation of gamma detector on HPLC

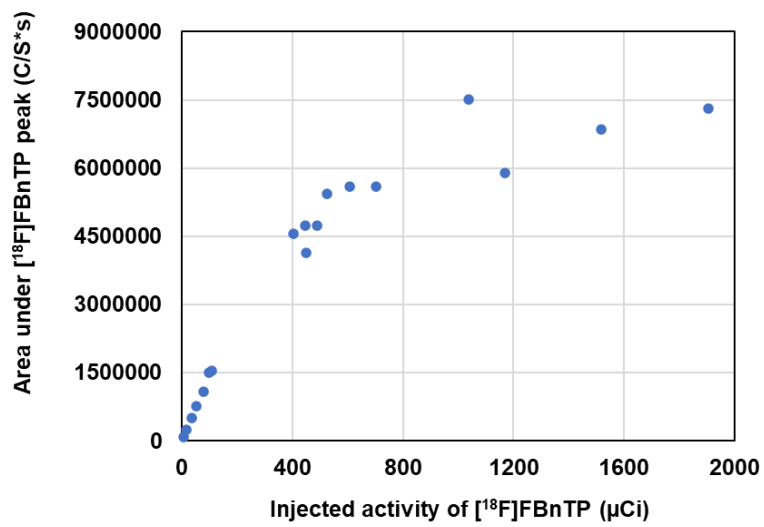

**Figure S11.** Injected activity of [ $^{18}\text{F}$ ]FBnTP and corresponding obtained signal counts from gamma detector on HPLC.

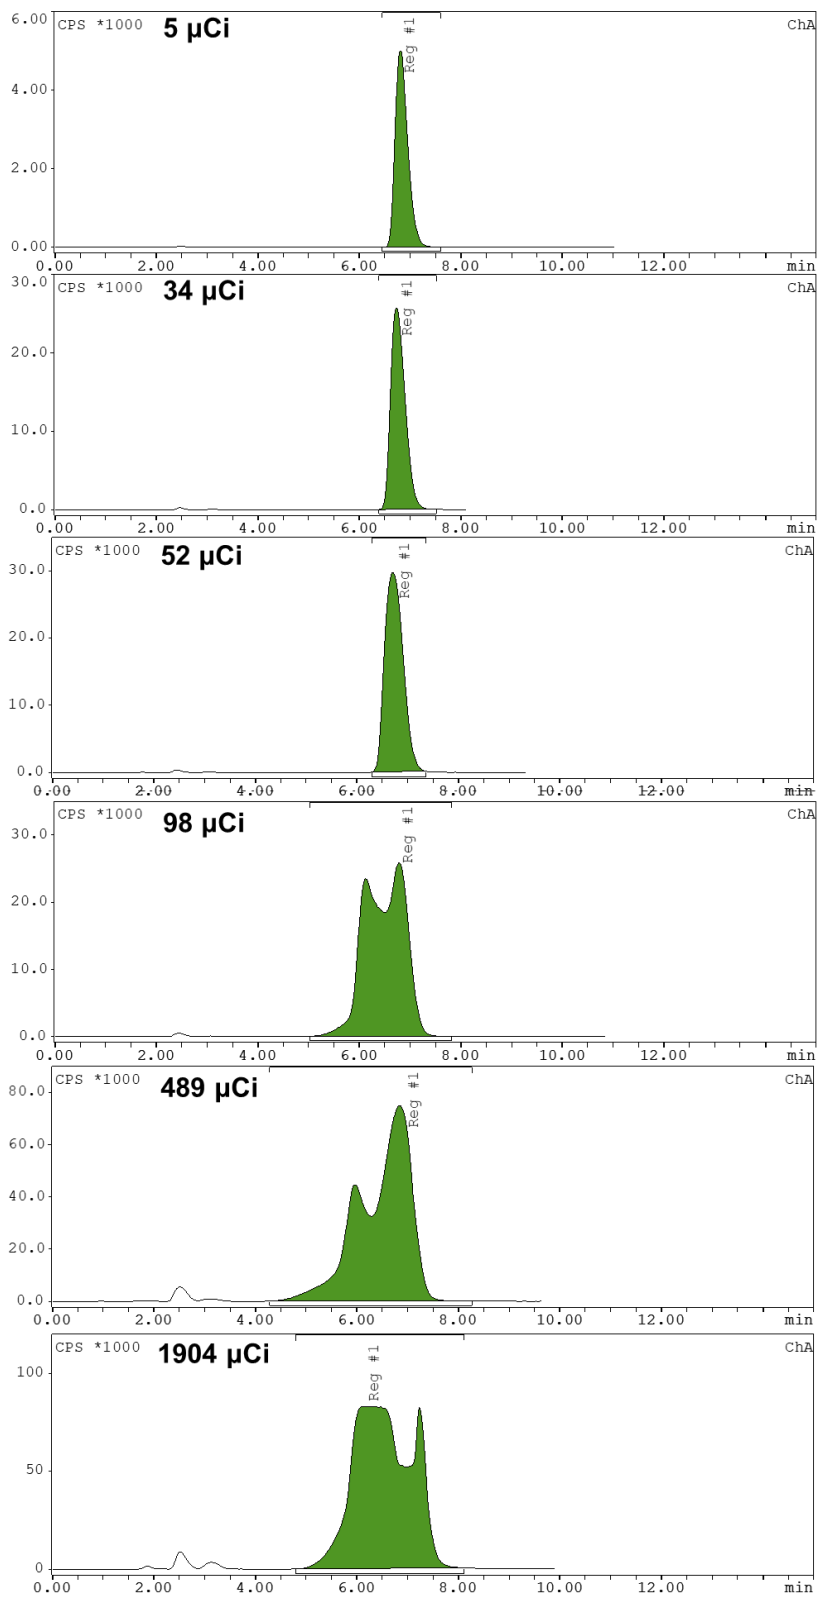

**Figure S12.** Examples of radio-HPLC chromatograms (gamma detector) for samples of [ $^{18}\text{F}$ ]FBnTP diluted by different amounts. The total activity in the  $\sim 180\ \mu\text{L}$  injection is shown for each chromatogram, with decay-correction to the actual time at which sample reached detector.

## 9. References

- 1 X. Zhang, F. Basuli and R. E. Swenson, *J Label Compd Radiopharm*, 2019, **62**, 139–145.
- 2 Y. Lu and R. M. van Dam, *Nucl. Med. Biol.*, 2021, **96–97**, S15–S16.
- 3 J. Jones, V. Do, Y. Lu and R. M. van Dam, *J. Chem. Eng.*, 2023, **468**, 143524.
